# Supplementary material
Source: PubMed Central journal article supplement (PMC3791271)
Supplement: mmc1.pdf [file mmc1.pdf]

The American Journal of Human Genetics, Volume 93

## **Supplemental Data**

# **The IL-33/ST2L Pathway Is Associated with Coronary Artery Disease in a Chinese Han Population**

**Xin Tu, Shaofang Nie, Yuhua Liao, Hongsong Zhang, Qian Fan, Chengqi Xu, Ying Bai, Fan Wang, Xiang Ren, Tingting Tang, Ni Xia, Sisi Li, Yuan Huang, Juan Liu, Qing Yang, Yuanyuan Zhao, Qiulun Lv, Qingxian Li, Yue Li, Yunlong Xia, Jin Qian, Bin Li, Gang Wu, Yanxia Wu, Yan Yang, Qing K. Wang, and Xiang Cheng**

**SUPPLEMENTAL DATA**

TABLE S1

| Population (n, case/control)  | Gene-SNP (reference allele)  | Model | Case (n)      | Control (n)    | <i>P</i> -obs          | <i>P</i> -adj          | OR (95%CI)      |
|-------------------------------|------------------------------|-------|---------------|----------------|------------------------|------------------------|-----------------|
| CAD-discovery (860/707)       |                              |       |               |                |                        |                        |                 |
|                               | <i>IL33</i> -rs7025417(T)    | ADD   | 275/456/129   | 177/375/155    | $2.31 \times 10^{-4}$  | $5.17 \times 10^{-5}$  | 1.36(1.17-1.58) |
|                               |                              | DOM   | 731/129       | 552/155        | $3.99 \times 10^{-4}$  | $4.74 \times 10^{-4}$  | 1.59(1.23-2.07) |
|                               |                              | REC   | 275/585       | 177/530        | $2.54 \times 10^{-3}$  | $1.51 \times 10^{-3}$  | 1.44(1.15-1.81) |
|                               | <i>IL1RL1</i> -rs11685424(G) | ADD   | 272/431/157   | 177/374/156    | $9.61 \times 10^{-3}$  | $1.15 \times 10^{-3}$  | 1.28(1.10-1.48) |
|                               |                              | DOM   | 703/157       | 551/156        | $6.05 \times 10^{-2}$  | $3.17 \times 10^{-2}$  | 1.32(1.02-1.69) |
|                               |                              | REC   | 272/588       | 177/530        | $4.08 \times 10^{-3}$  | $1.77 \times 10^{-3}$  | 1.43(1.14-1.80) |
| CAD-validation (575/471)      |                              |       |               |                |                        |                        |                 |
|                               | <i>IL33</i> -rs7025417(T)    | ADD   | 184/304/87    | 104/250/117    | $1.87 \times 10^{-5}$  | $5.63 \times 10^{-7}$  | 1.61(1.34-1.94) |
|                               |                              | DOM   | 488/87        | 354/117        | $8.03 \times 10^{-5}$  | $4.20 \times 10^{-5}$  | 1.92(1.40-2.62) |
|                               |                              | REC   | 184/391       | 104/367        | $3.53 \times 10^{-4}$  | $3.16 \times 10^{-4}$  | 1.68(1.27-2.22) |
|                               | <i>IL1RL1</i> -rs11685424(G) | ADD   | 184/288/103   | 105/249/117    | $5.19 \times 10^{-4}$  | $1.62 \times 10^{-5}$  | 1.49(1.24-1.79) |
|                               |                              | DOM   | 472/103       | 354/117        | $6.23 \times 10^{-3}$  | $2.93 \times 10^{-3}$  | 1.58(1.17-2.14) |
|                               |                              | REC   | 184/391       | 105/366        | $4.78 \times 10^{-4}$  | $4.24 \times 10^{-4}$  | 1.66(1.25-2.19) |
| CAD-replication-1 (2016/1647) |                              |       |               |                |                        |                        |                 |
|                               | <i>IL33</i> -rs7025417(T)    | ADD   | 647/1079/290  | 428/884/335    | $2.55 \times 10^{-7}$  | $6.59 \times 10^{-8}$  | 1.31(1.19-1.45) |
|                               |                              | DOM   | 1726/290      | 1312/335       | $1.88 \times 10^{-6}$  | $2.66 \times 10^{-6}$  | 1.52(1.28-1.81) |
|                               |                              | REC   | 647/1369      | 428/1219       | $5.40 \times 10^{-5}$  | $3.00 \times 10^{-5}$  | 1.36(1.18-1.58) |
|                               | <i>IL1RL1</i> -rs11685424(G) | ADD   | 636/1012/368  | 377/837/433    | $6.87 \times 10^{-12}$ | $1.34 \times 10^{-12}$ | 1.41(1.28-1.55) |
|                               |                              | DOM   | 1648/368      | 1214/433       | $4.81 \times 10^{-9}$  | $5.35 \times 10^{-9}$  | 1.60(1.37-1.88) |
|                               |                              | REC   | 636/1380      | 377/1270       | $5.63 \times 10^{-9}$  | $6.56 \times 10^{-9}$  | 1.58(1.34-1.81) |
| CAD-replication-2 (1070/1984) |                              |       |               |                |                        |                        |                 |
|                               | <i>IL33</i> -rs7025417(T)    | ADD   | 373/525/172   | 474/1023/487   | $1.76 \times 10^{-12}$ | $5.29 \times 10^{-13}$ | 1.50(1.34-1.67) |
|                               |                              | DOM   | 898/172       | 1497/487       | $5.65 \times 10^{-8}$  | $1.09 \times 10^{-7}$  | 1.70(1.40-2.06) |
|                               |                              | REC   | 373/697       | 474/1510       | $1.05 \times 10^{-10}$ | $1.91 \times 10^{-10}$ | 1.70(1.44-2.00) |
|                               | <i>IL1RL1</i> -rs11685424(G) | ADD   | 350/540/180   | 435/1036/513   | $4.47 \times 10^{-13}$ | $9.73 \times 10^{-14}$ | 1.52(1.36-1.69) |
|                               |                              | DOM   | 890/180       | 1471/513       | $1.29 \times 10^{-8}$  | $1.77 \times 10^{-8}$  | 1.72(1.42-2.08) |
|                               |                              | REC   | 350/720       | 435/1549       | $7.68 \times 10^{-11}$ | $1.12 \times 10^{-10}$ | 1.73(1.46-2.05) |
| CAD-Combined (4521/4809)      |                              |       |               |                |                        |                        |                 |
|                               | <i>IL33</i> -rs7025417(T)    | ADD   | 1479/2364/678 | 1183/2532/1094 | $1.99 \times 10^{-28}$ | $3.57 \times 10^{-30}$ | 1.42(1.34-1.51) |
|                               |                              | DOM   | 3843/678      | 3715/1094      | $1.42 \times 10^{-21}$ | $1.74 \times 10^{-22}$ | 1.70(1.53-1.89) |

|                                   |     |               |                |                        |                        |                 |
|-----------------------------------|-----|---------------|----------------|------------------------|------------------------|-----------------|
| <i>ILIRLI</i> -rs11685424(G)      | REC | 1479/3042     | 1183/3626      | $4.16 \times 10^{-18}$ | $1.54 \times 10^{-18}$ | 1.50(1.37-1.64) |
|                                   | ADD | 1442/2271/808 | 1094/2496/1219 | $1.35 \times 10^{-29}$ | $2.17 \times 10^{-30}$ | 1.41(1.33-1.50) |
|                                   | DOM | 3713/808      | 3590/1219      | $2.10 \times 10^{-18}$ | $2.54 \times 10^{-18}$ | 1.56(1.41-1.73) |
|                                   | REC | 1442/3079     | 1094/3715      | $3.26 \times 10^{-23}$ | $4.98 \times 10^{-23}$ | 1.59(1.45-1.75) |
| GeneID-anatomical-CAD (1598/4809) |     |               |                |                        |                        |                 |
| <i>IL33</i> -rs7025417(T)         | ADD | 504/844/250   | 1183/2532/1094 | $1.00 \times 10^{-11}$ | $1.06 \times 10^{-11}$ | 1.35(1.24-1.47) |
|                                   | DOM | 1348/250      | 3715/1094      | $1.67 \times 10^{-9}$  | $3.83 \times 10^{-9}$  | 1.59(1.37-1.86) |
|                                   | REC | 504/1094      | 1183/3626      | $4.84 \times 10^{-8}$  | $2.87 \times 10^{-8}$  | 1.40(1.23-1.59) |
| <i>ILIRLI</i> -rs11685424(G)      | ADD | 493/820/285   | 1094/2496/1219 | $7.71 \times 10^{-14}$ | $1.02 \times 10^{-13}$ | 1.38(1.27-1.51) |
|                                   | DOM | 1313/285      | 3590/1219      | $9.13 \times 10^{-10}$ | $7.46 \times 10^{-9}$  | 1.55(1.33-1.79) |
|                                   | REC | 493/1105      | 1094/3715      | $9.04 \times 10^{-11}$ | $3.32 \times 10^{-10}$ | 1.52(1.32-1.72) |
| GeneID-clinical-CAD (2923/4809)   |     |               |                |                        |                        |                 |
| <i>IL33</i> -rs7025417(T)         | ADD | 975/1520/428  | 1183/2532/1094 | $1.00 \times 10^{-24}$ | $6.33 \times 10^{-23}$ | 1.43(1.33-1.53) |
|                                   | DOM | 2495/428      | 3715/1094      | $4.21 \times 10^{-18}$ | $2.51 \times 10^{-16}$ | 1.70(1.50-1.93) |
|                                   | REC | 975/1948      | 1183/3626      | $8.54 \times 10^{-17}$ | $6.94 \times 10^{-15}$ | 1.52(1.37-1.68) |
| <i>ILIRLI</i> -rs11685424(G)      | ADD | 949/1451/523  | 1094/2496/1219 | $7.43 \times 10^{-25}$ | $4.06 \times 10^{-22}$ | 1.41(1.31-1.51) |
|                                   | DOM | 2400/523      | 3590/1219      | $3.21 \times 10^{-14}$ | $4.29 \times 10^{-11}$ | 1.49(1.32-1.68) |
|                                   | REC | 949/1947      | 1094/3715      | $6.88 \times 10^{-21}$ | $1.14 \times 10^{-19}$ | 1.64(1.47-1.82) |

Table S1. Genotypic association analysis of rs7025417 in *IL33* and rs11685424 in *ILIRLI* with CAD in the GeneID Chinese Han Population. *P-obs*, observed *P* value; *P-adj*, *P* value adjusted by covariates; OR, odds ratio after adjustment; ADD, additive model, rs7025417\_TT/TC/CC, rs11685424\_GG/GA/AA; DOM, dominant model, rs7025417\_TT+TC/CC, rs11685424\_GG+GA/AA; REC, recessive model, rs7025417\_TT/TC+CC, rs11685424\_GG/GA+AA.

TABLE S2

| Gene-SNP (reference allele) | Frequency |         | <i>P-hwe</i> | <i>P-obs</i> | <i>P-adj</i> | OR&(95%CI)      |
|-----------------------------|-----------|---------|--------------|--------------|--------------|-----------------|
|                             | Case      | Control |              |              |              |                 |
| <i>IL33</i> -rs10975514(G)  | 0.416     | 0.439   | 0.006        | 0.23         | 0.2          | 0.91(0.78-1.06) |
| <i>IL33</i> -rs10975519(C)  | 0.435     | 0.444   | 0.998        | 0.61         | 0.64         | 0.96(0.83-1.12) |
| <i>IL1RL1</i> -rs3771180(T) | 0.134     | 0.148   | 0.005        | 0.28         | 0.33         | 0.89(0.72-1.11) |

Table S2. Allelic associations between rs10975514, rs10975519 and rs3771180 and CAD in the GeneID-discovery population. *P-hwe*, *P* value from Hardy-Weinberg equilibrium tests; *P-obs*, observed *P* value; *P-adj*, *P* value adjusted by covariates; OR, odds ratio after adjustment.
